# Supplementary material for: The circadian transcription factor ARNTL2 is regulated by weight-loss interventions in human white adipose tissue and inhibits adipogenesis
Source: PubMed Central journal article supplement (PMC9633602; doi:10.1038/s41420-022-01239-3), 2022-11-03

## **Original Western Blots**

**Figure 2B**

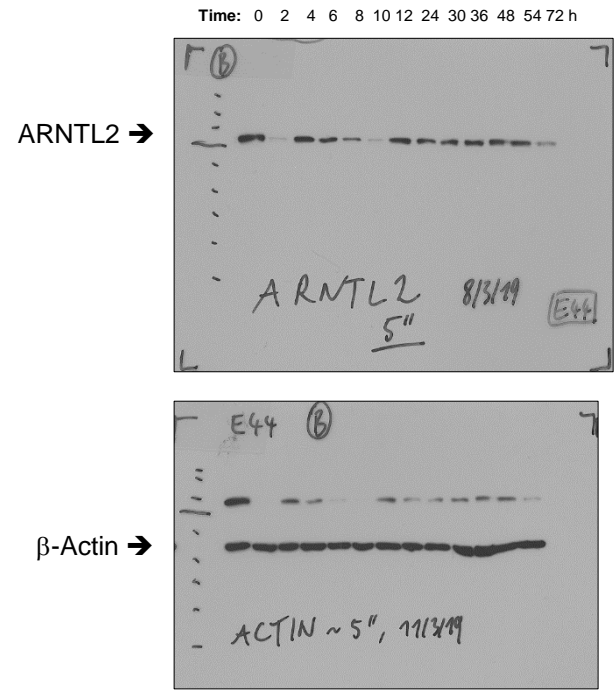

**Figure 2E**

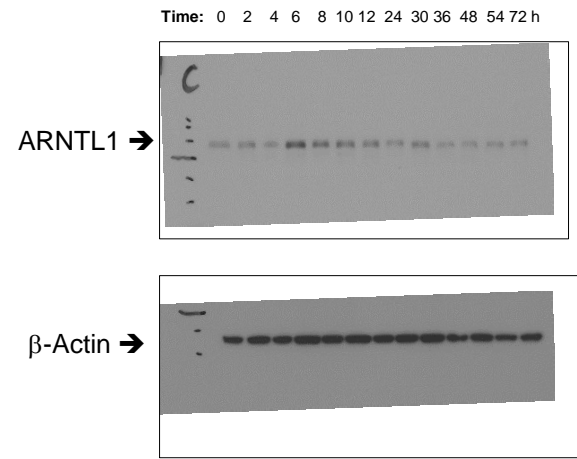

Figure 2H

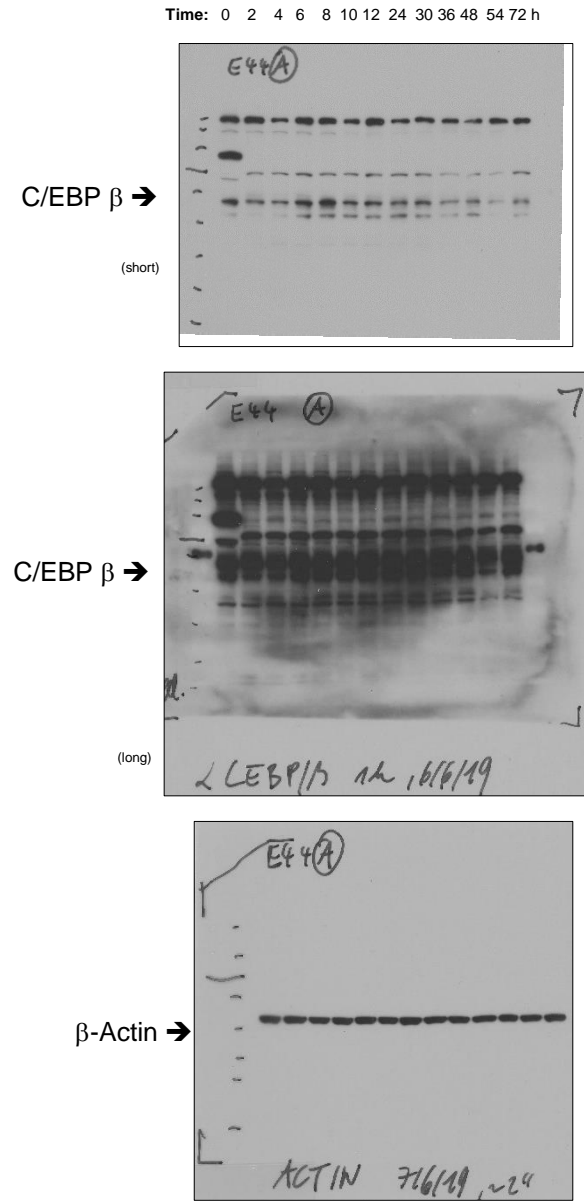

# Figure 2K

Time: 0 2 4 6 8 10 12 24 30 36 48 54 72 h

KLF4 →

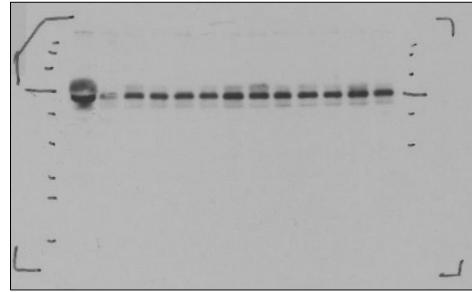

$\beta$ -Actin →

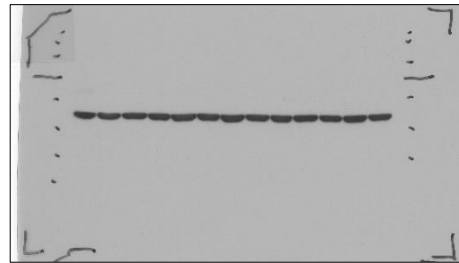

**Figure 3B**

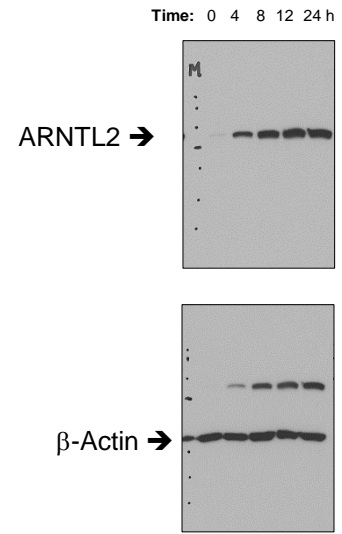

**Figure 3E**

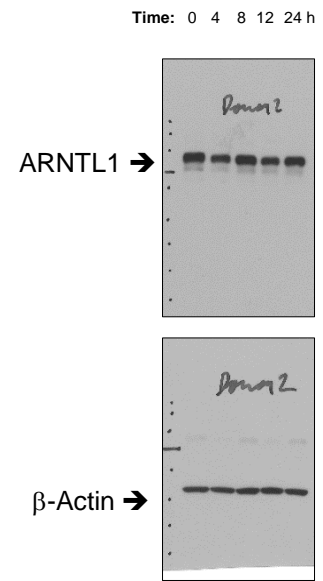

**Figure 4**

0                      4h  
Treatment: SS   A   DM   I   D   F   T   X

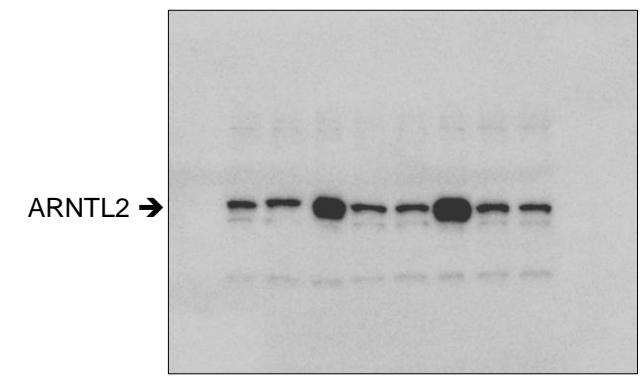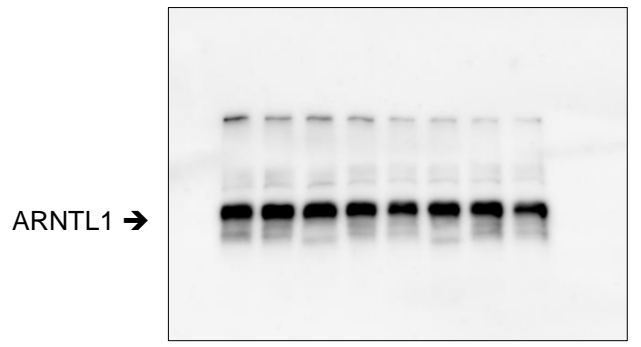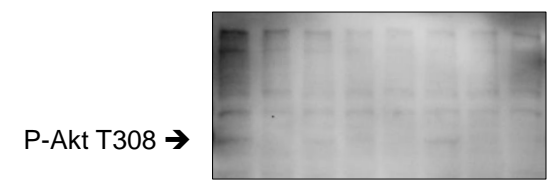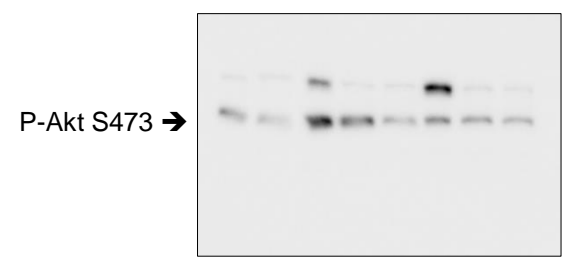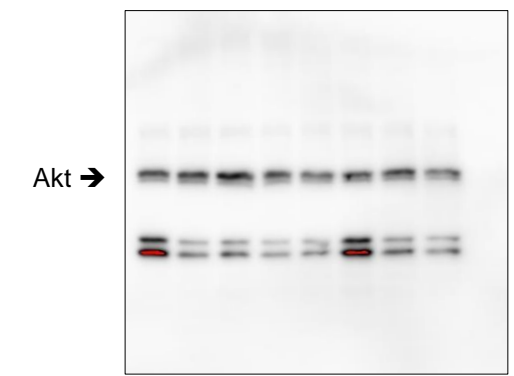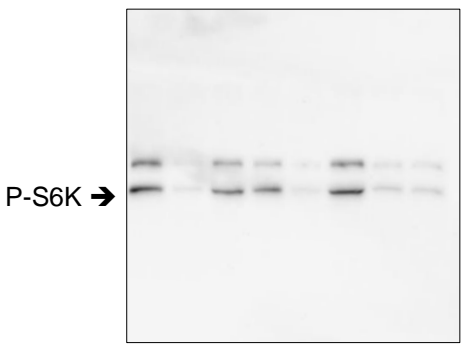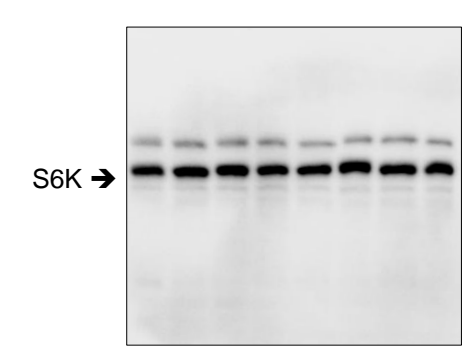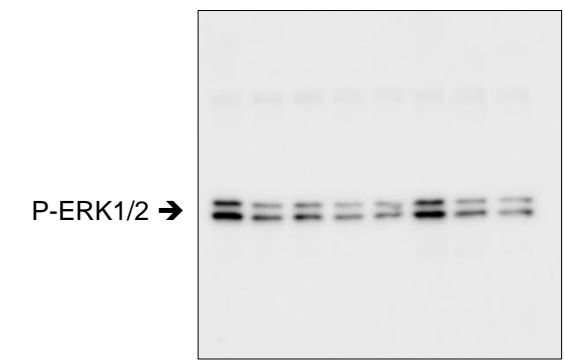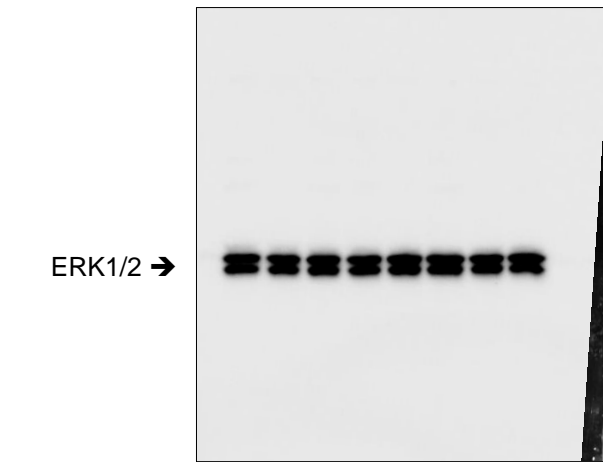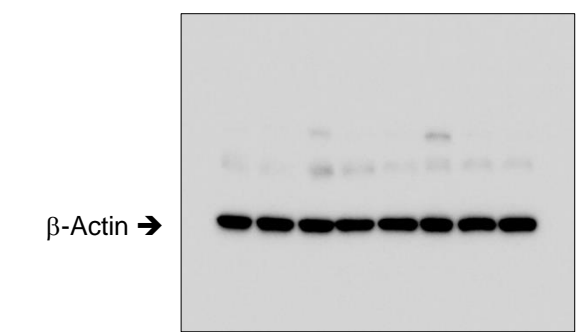



**Figure 5A – left panel**

DM, 30min

|           |   |   |   |   |   |   |   |   |
|-----------|---|---|---|---|---|---|---|---|
| DMSO      | + | + |   |   |   |   |   |   |
| U0126     |   |   | + |   |   | + |   | + |
| Akt Inh.  |   |   |   | + |   | + | + | + |
| Rapamycin |   |   |   |   | + |   | + | + |

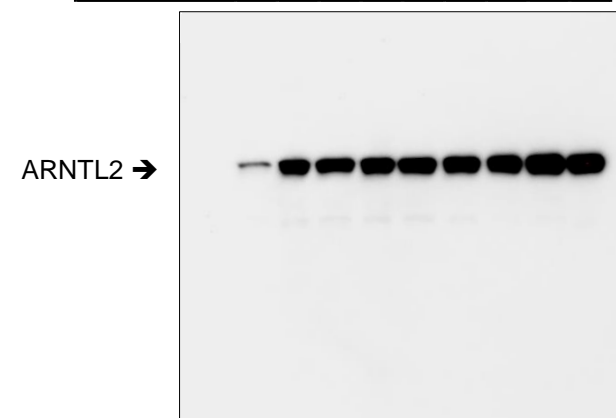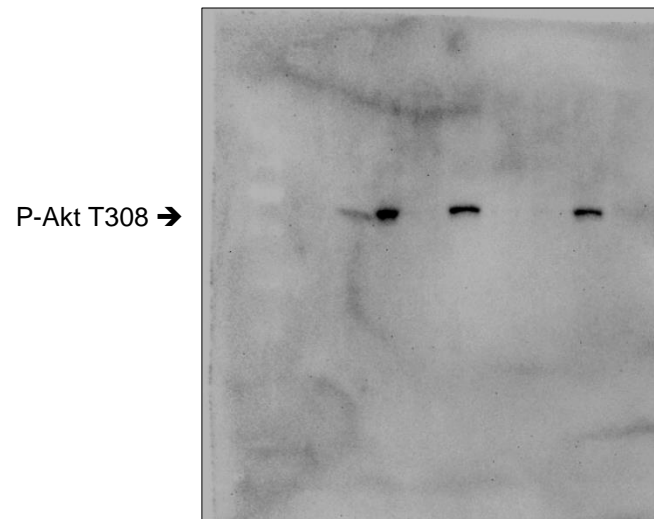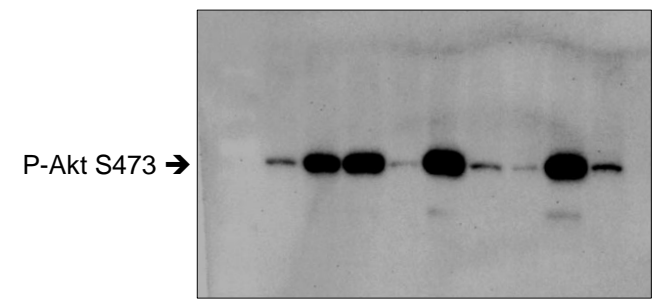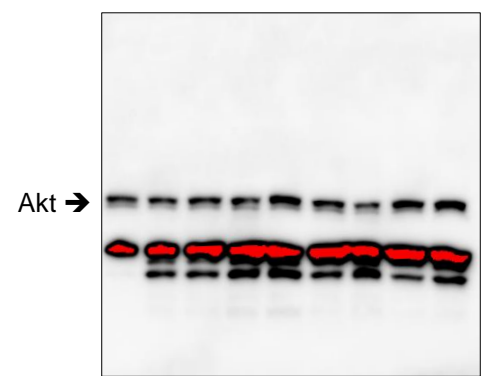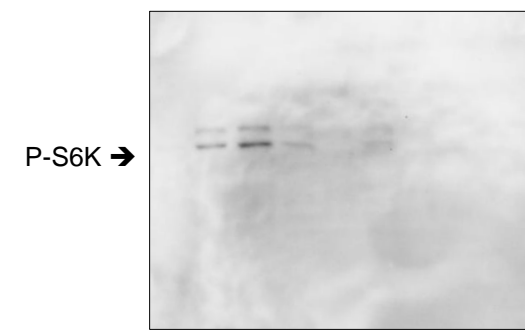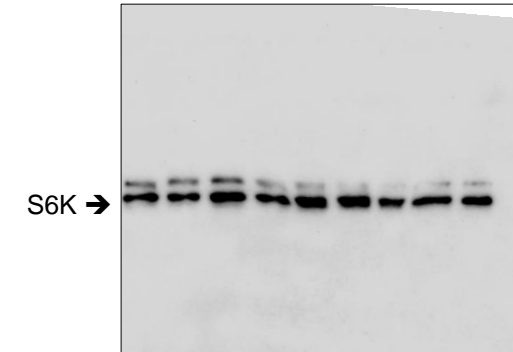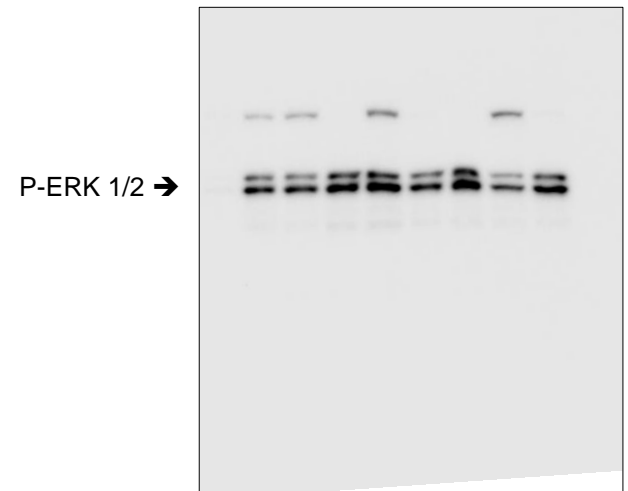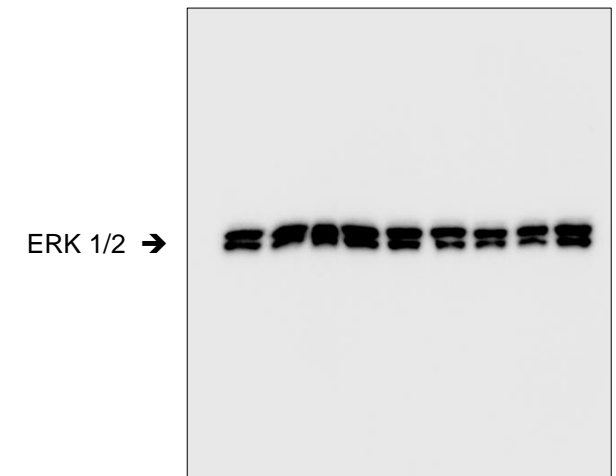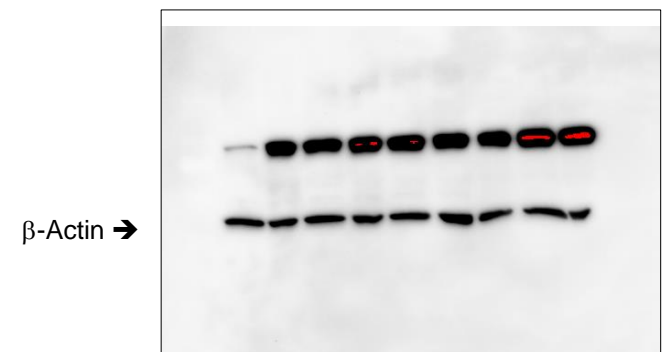

**Figure 5A – right panel**

|           | DM, 4h |   |   |   |   |   |   |   |
|-----------|--------|---|---|---|---|---|---|---|
| DMSO      | +      | + |   |   |   |   |   |   |
| U0126     |        |   | + |   |   | + |   | + |
| Akt Inh.  |        |   |   | + |   | + | + |   |
| Rapamycin |        |   |   |   | + |   | + | + |

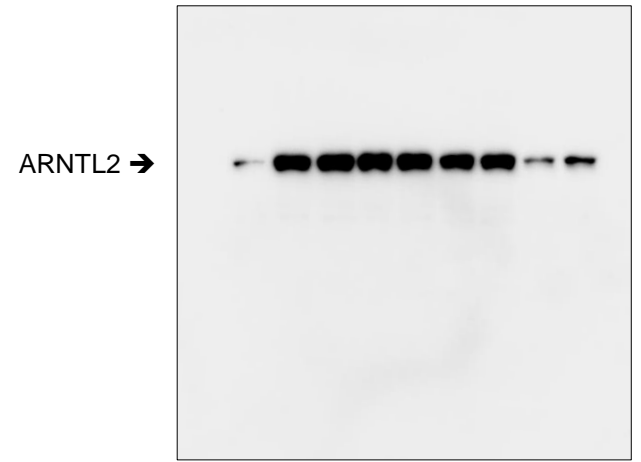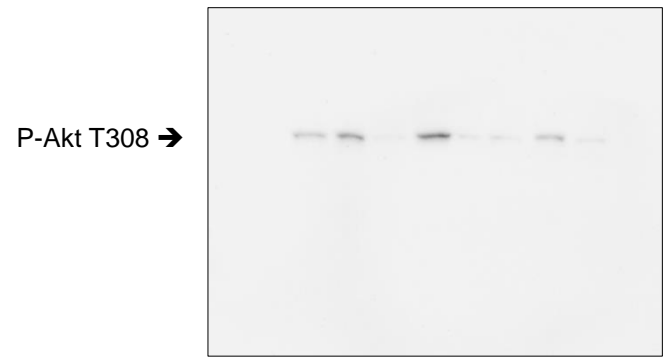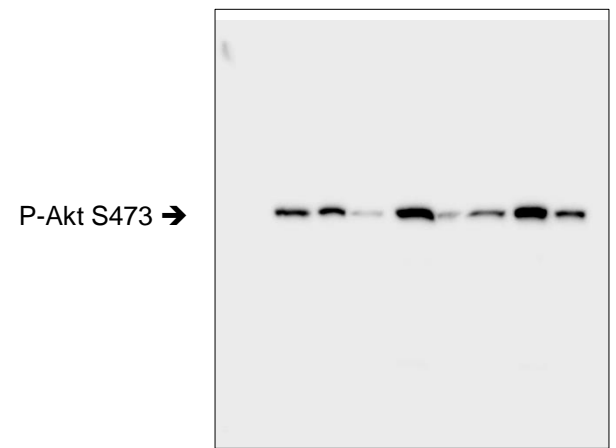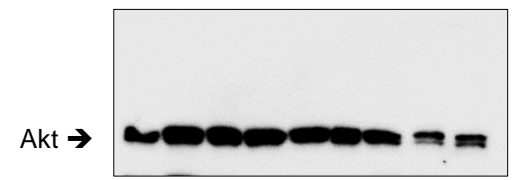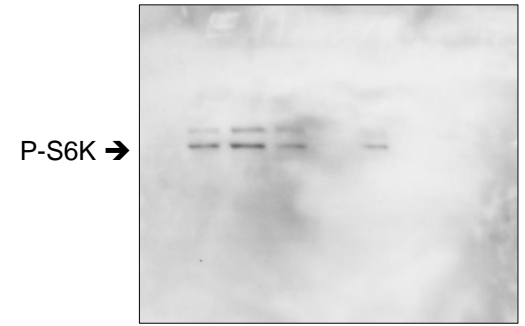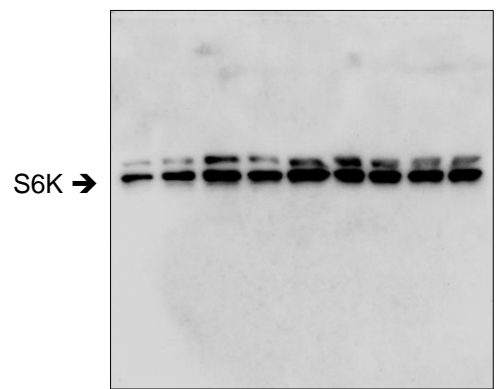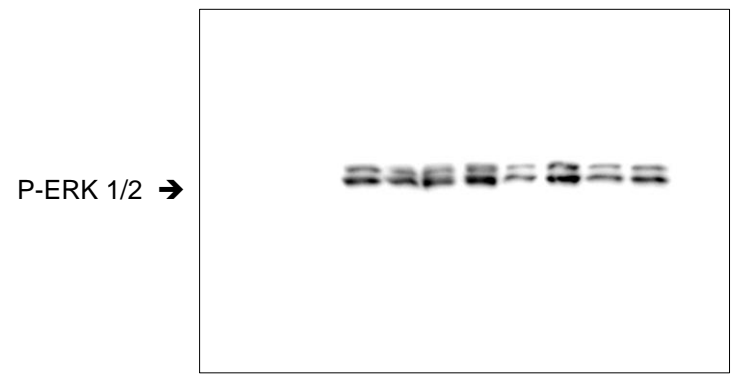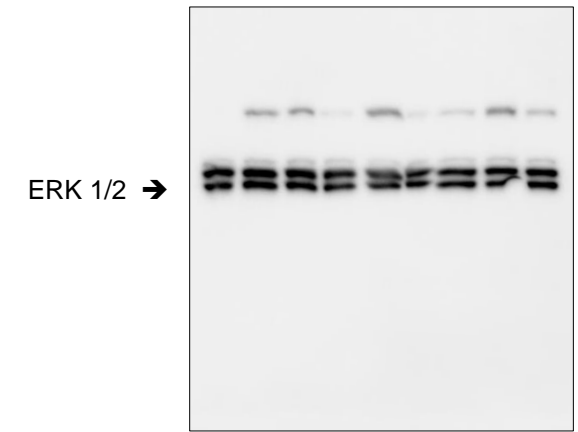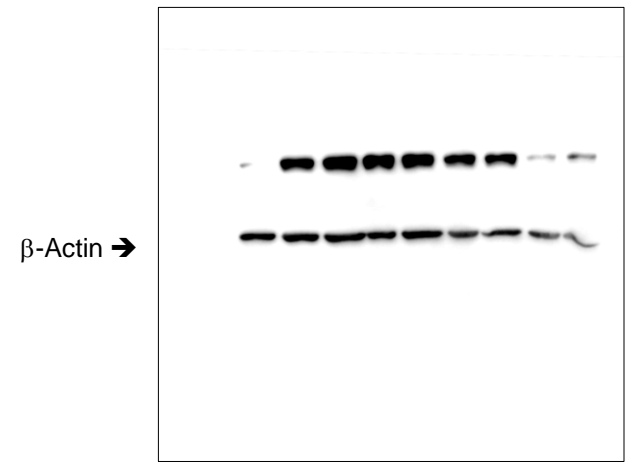

**Figure 5B**

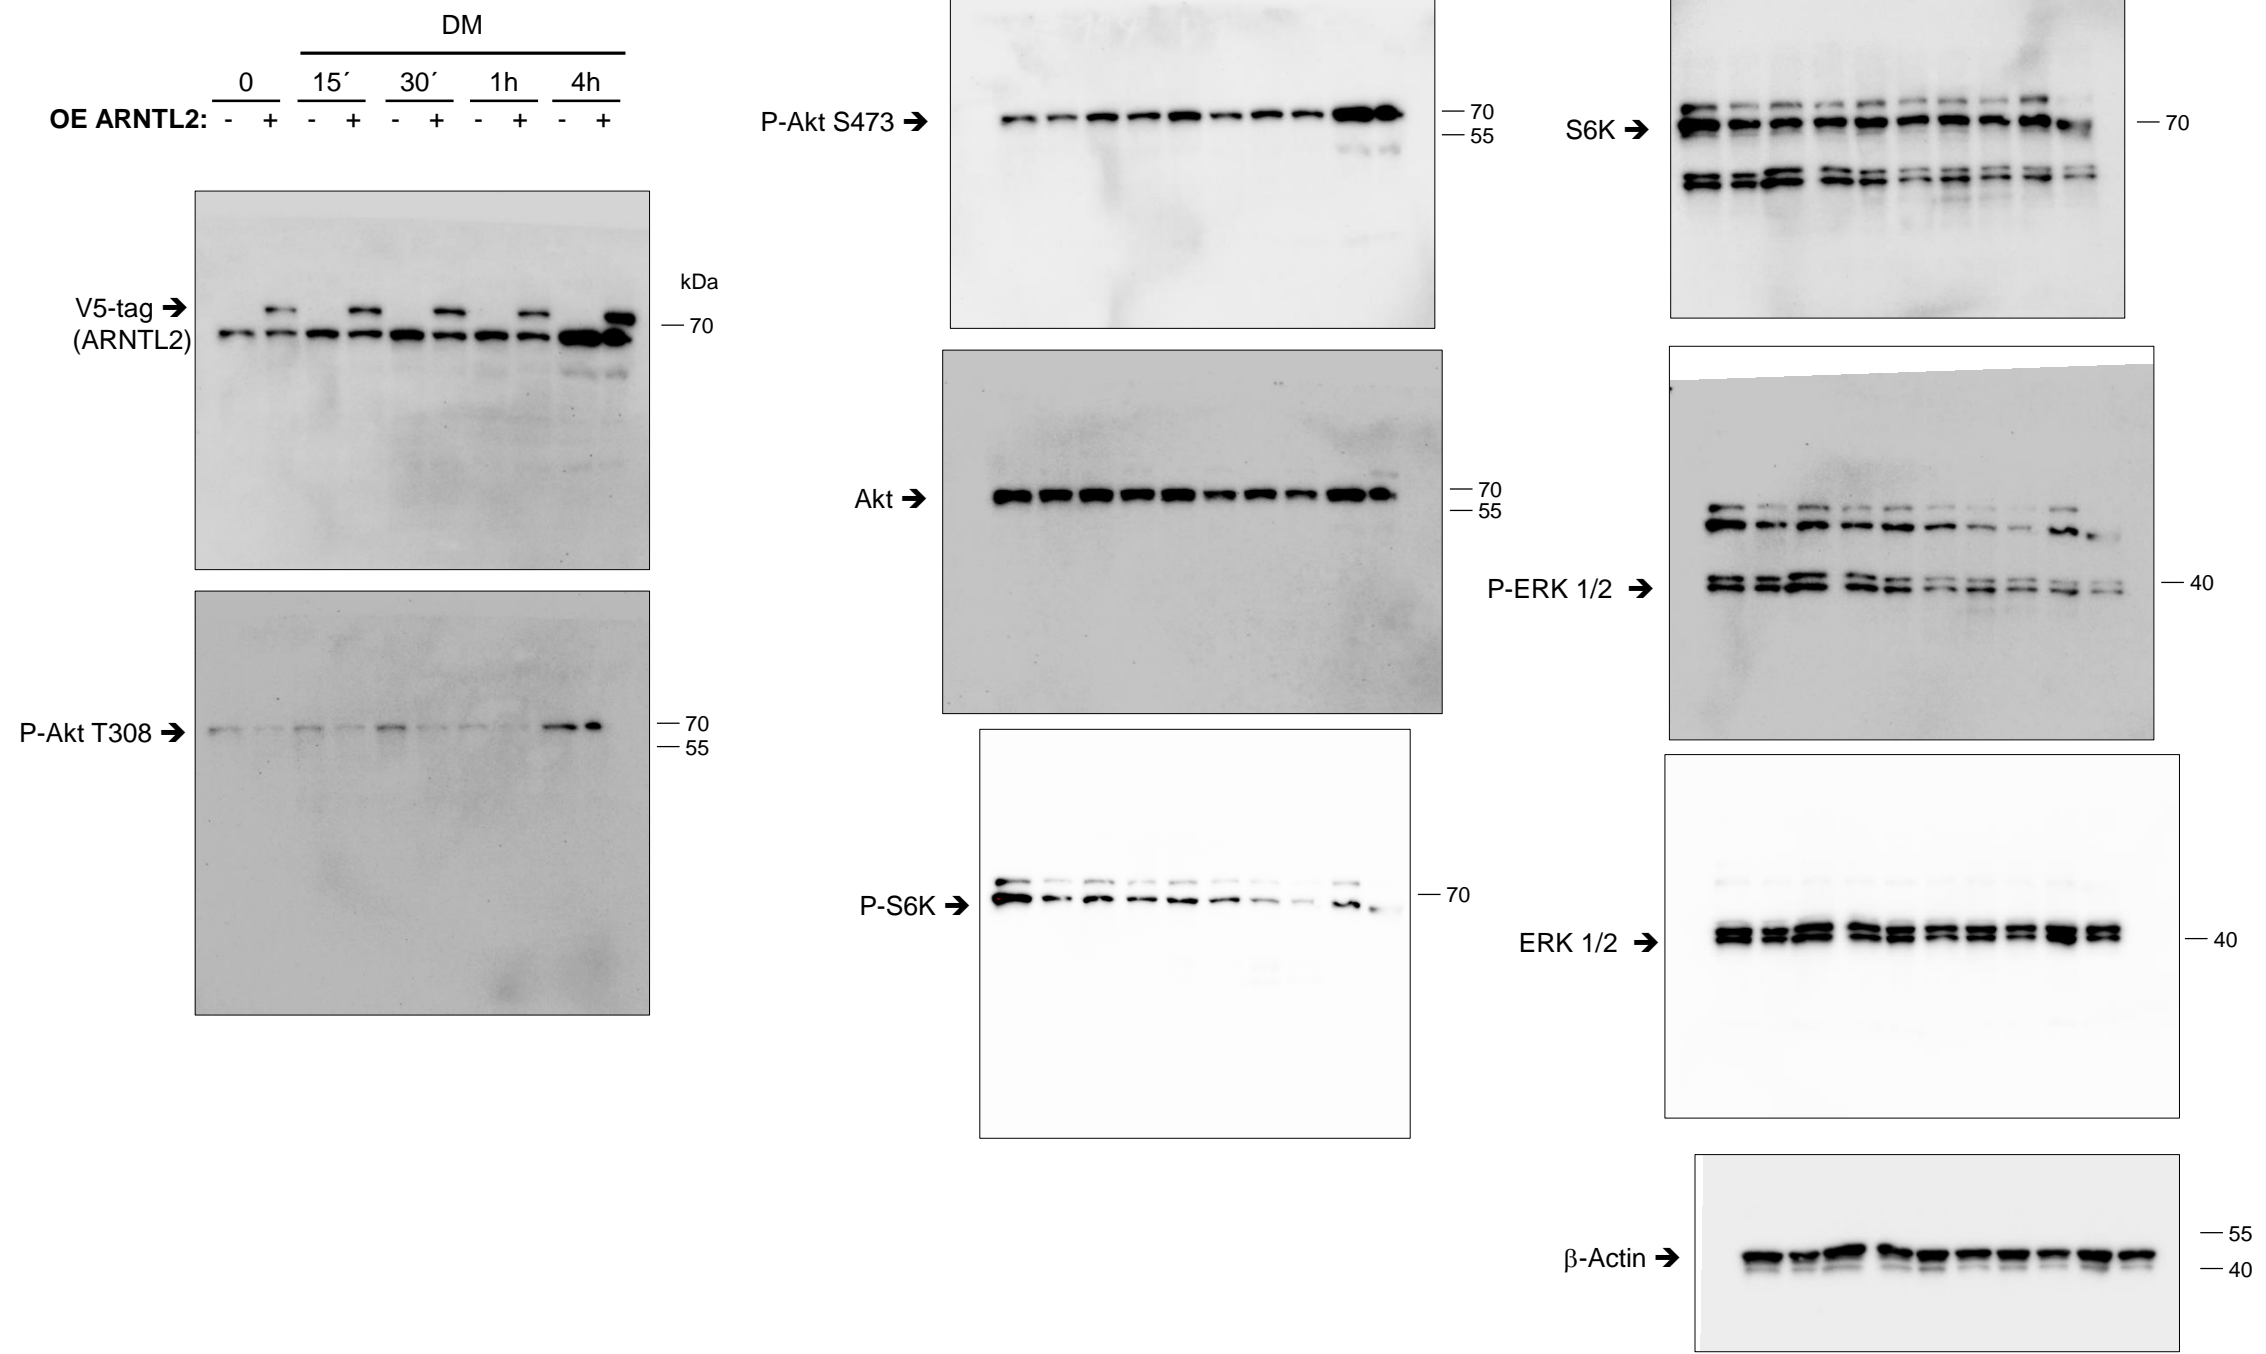

**Figure 6**

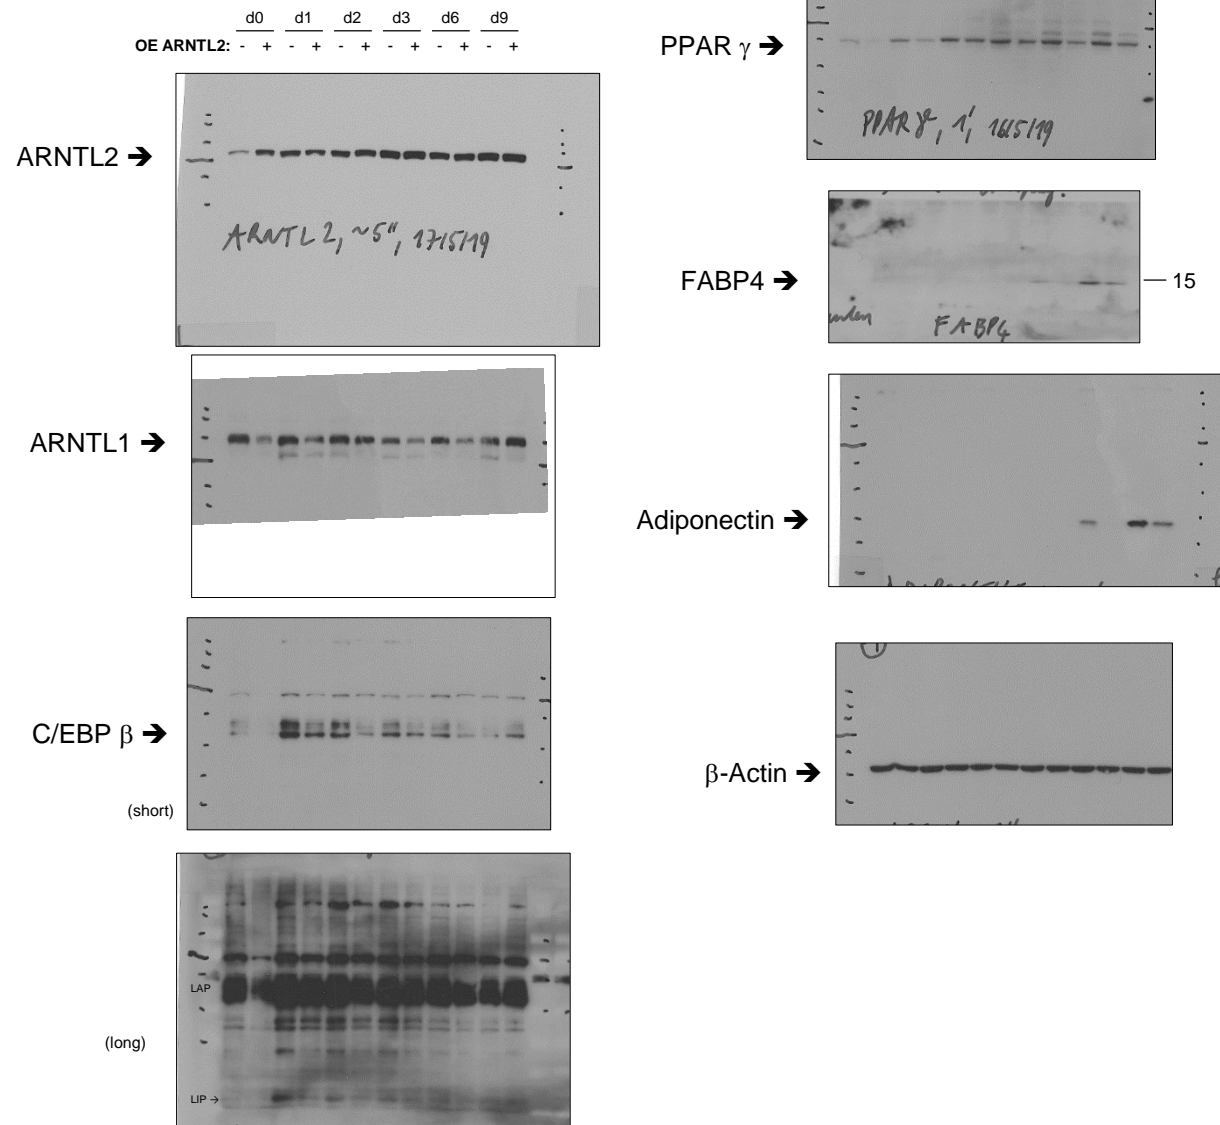

**Figure 7**

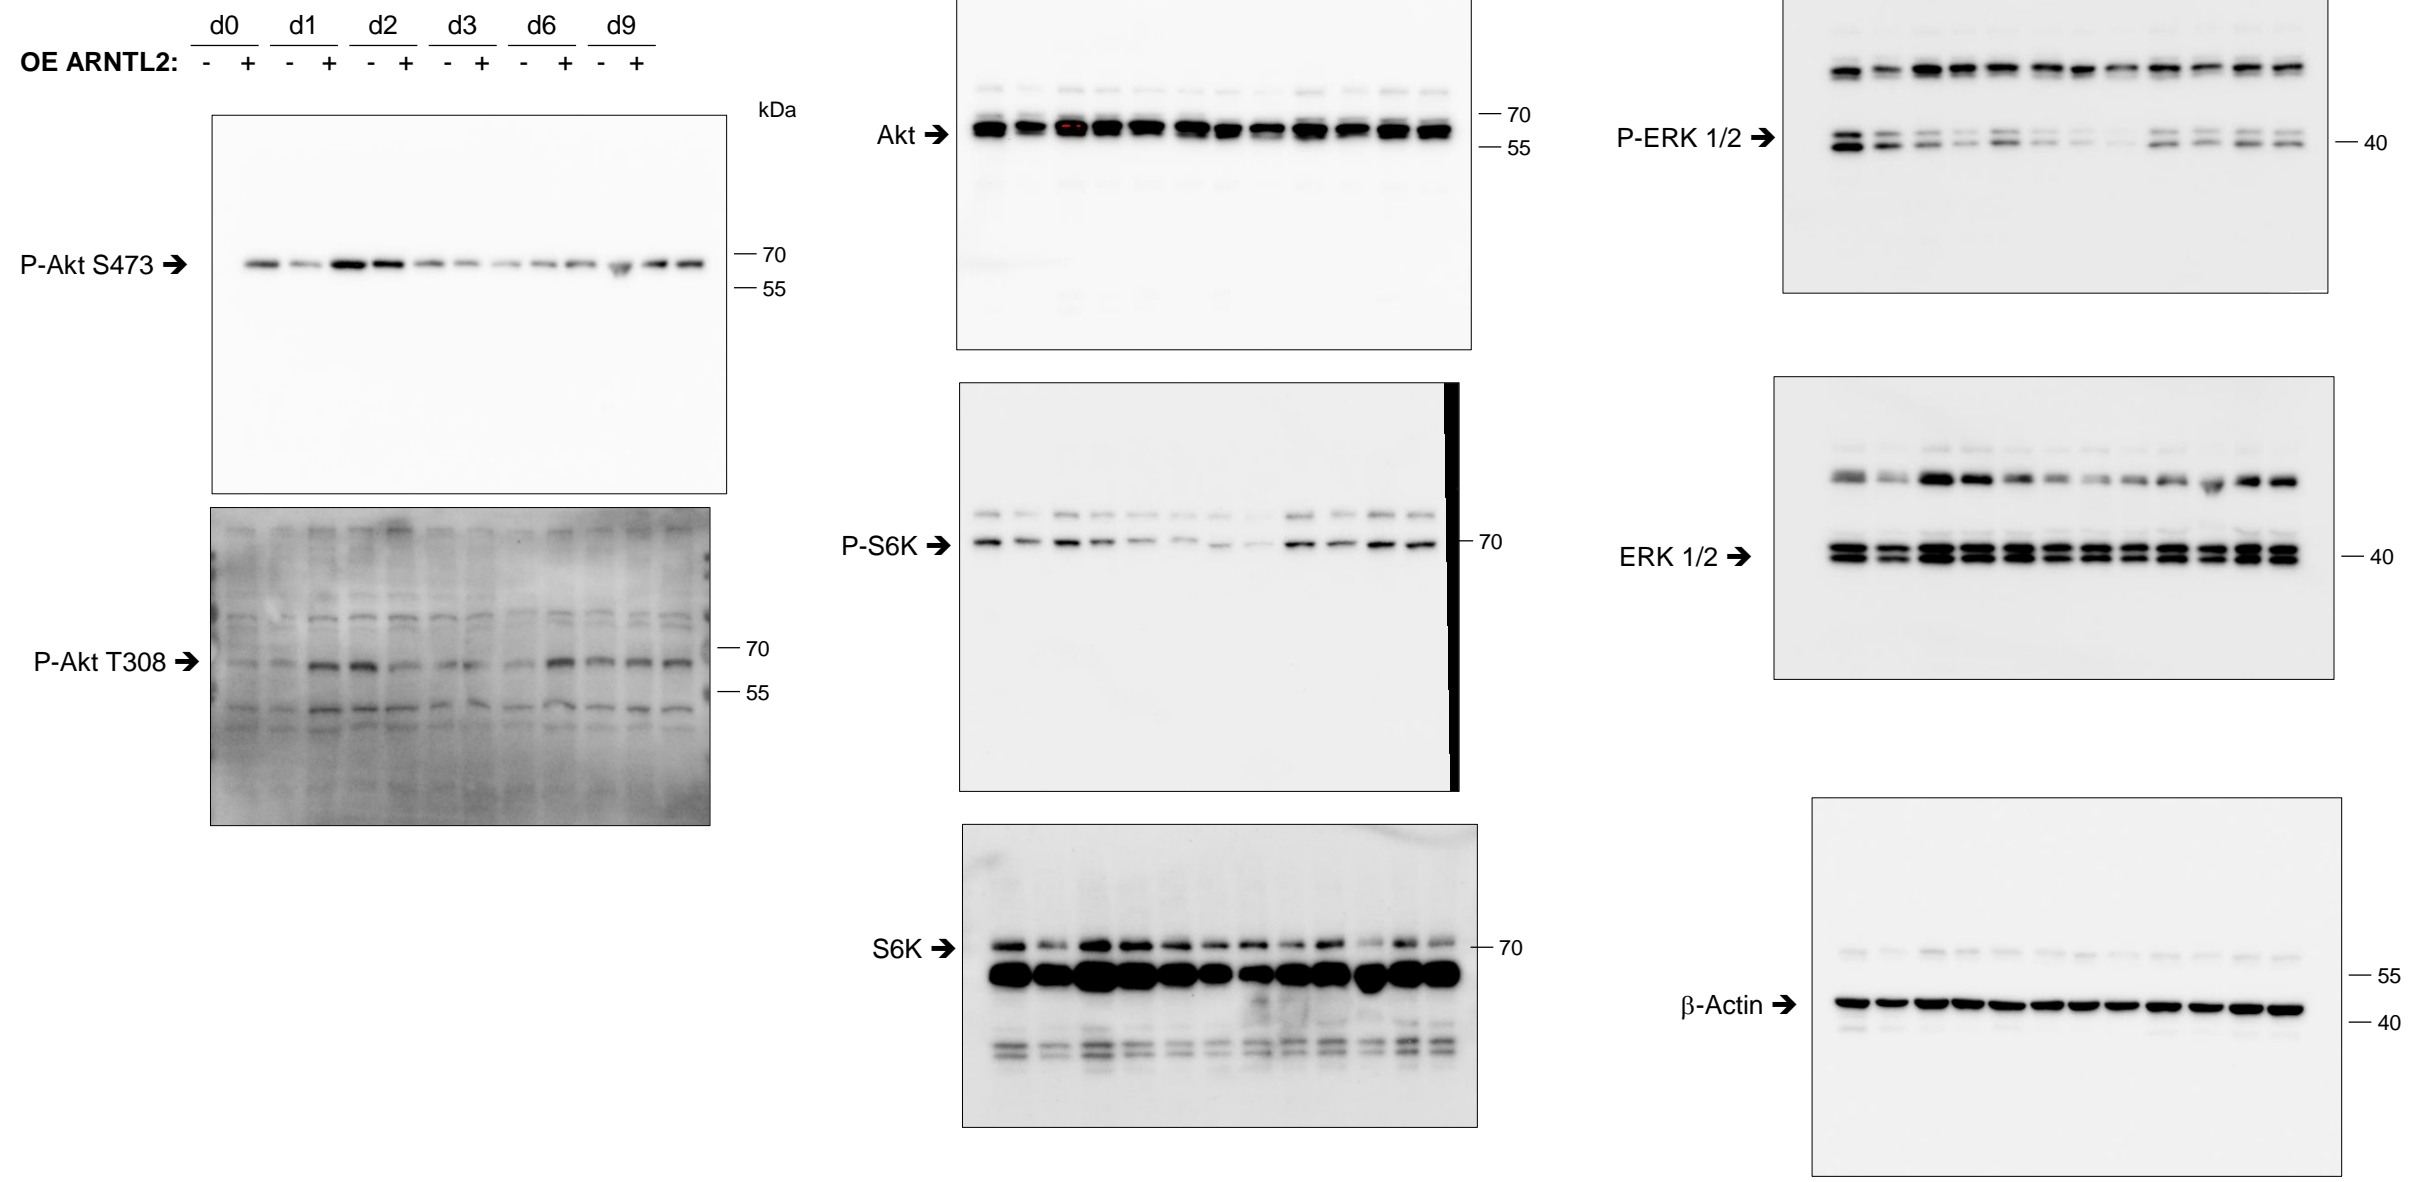

**Figure 8a**

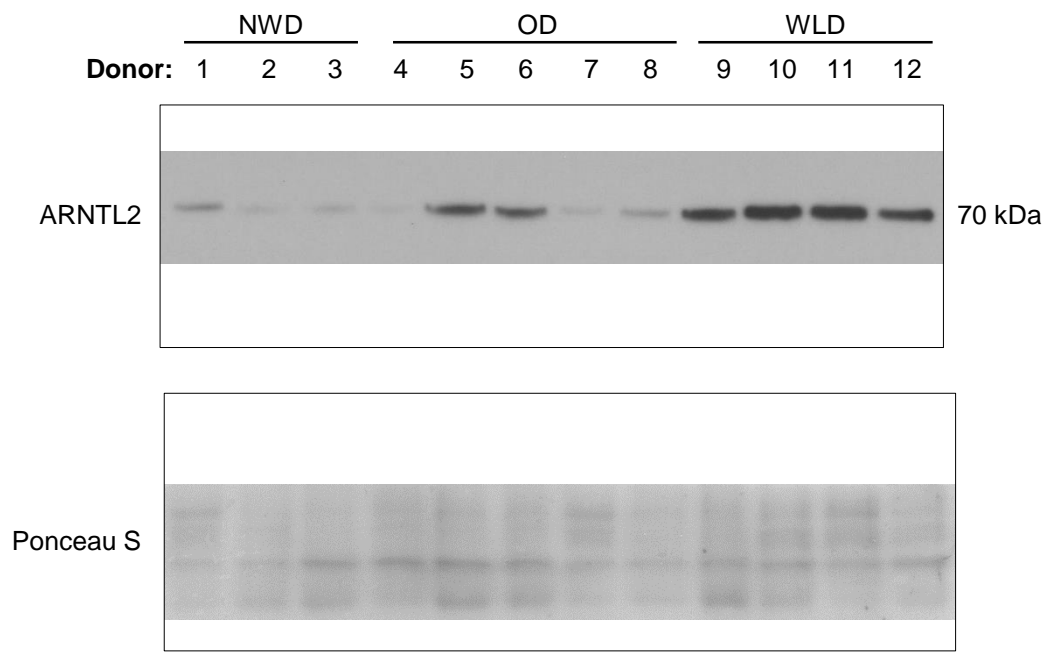

**Figure 8b**

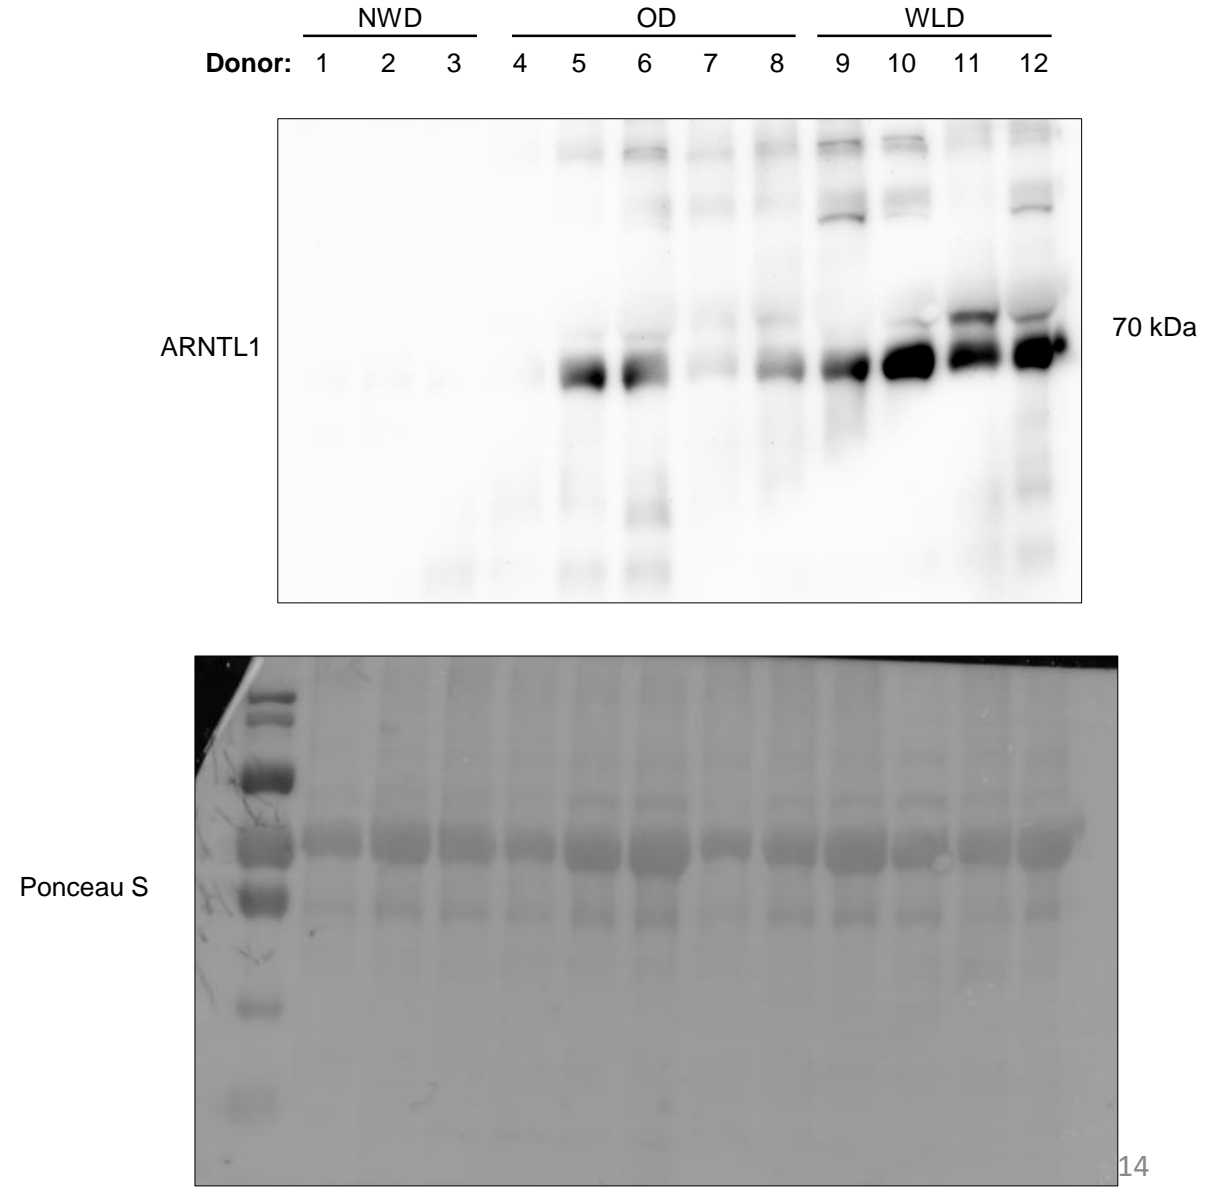

# Supplementary Figure S2 A

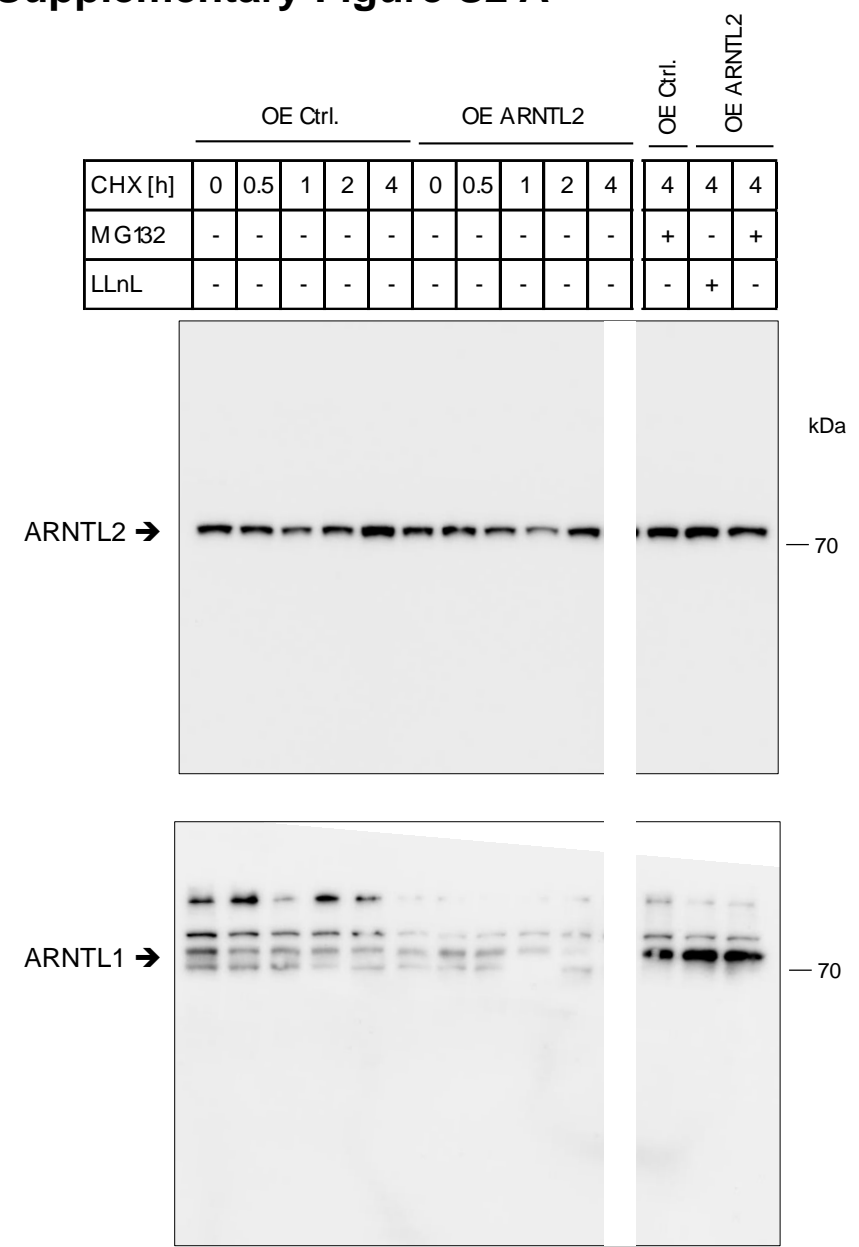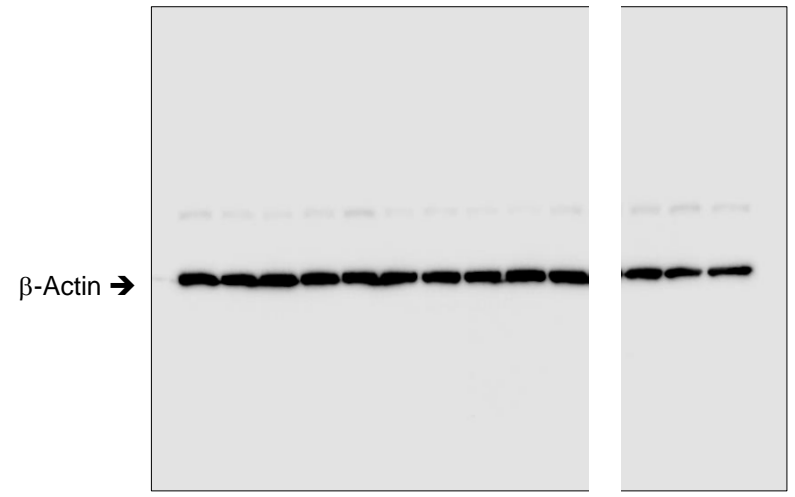

# Supplementary Figure S2 B

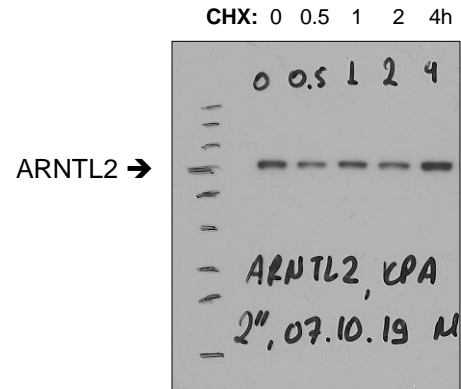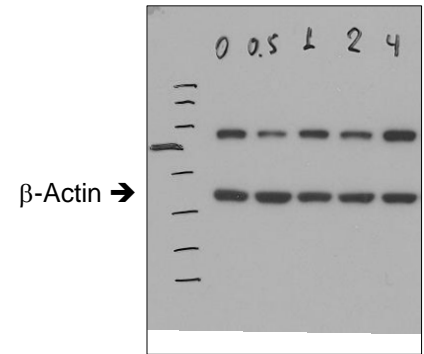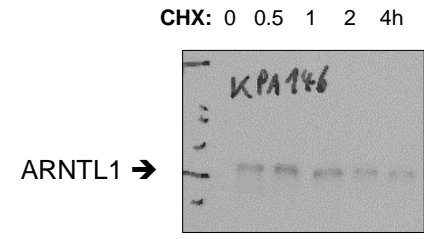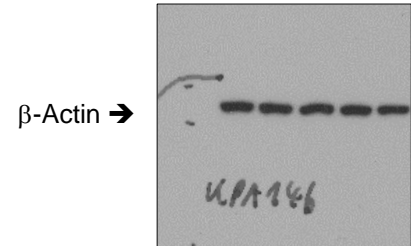



# Supplementary Figure S3 A

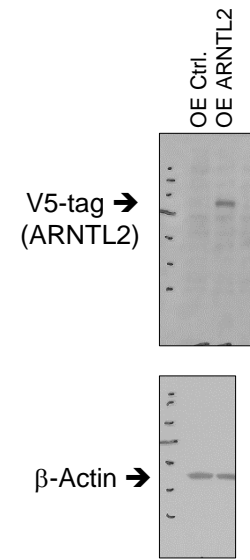

# Supplementary Figure S3 B

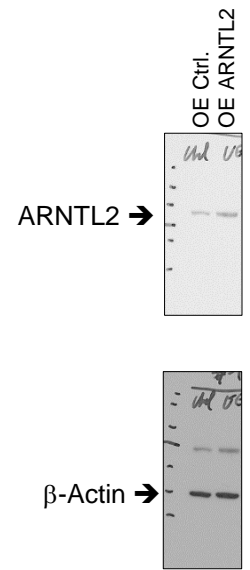

Supplement: 41420_2022_1239_MOESM10_ESM.pdf [file 41420_2022_1239_MOESM10_ESM.pdf]
